# Supplementary material
Source: PubMed Central journal article supplement (PMC6824995)
Supplement: NIHMS1538246-supplement-412_2019_725_MOESM1_ESM.pdf [file NIHMS1538246-supplement-412_2019_725_MOESM1_ESM.pdf]

## Cyclin B3 is dispensable for mouse spermatogenesis.

Mehmet E. Karasu and Scott Keeney

**Supplemental Table S1. Oligonucleotides**

| <b>Primer</b>                                 | <b>Forward 5' to 3'</b>                      | <b>Reverse 5' to 3'</b>                        |
|-----------------------------------------------|----------------------------------------------|------------------------------------------------|
| <b>CCNB3-A/B</b>                              | GAGTATTAGCACTGAGTCAGGGAC                     | GGAATACCTCAGTTTTCTTTTGCAC                      |
| <b>GT4-F/R</b>                                | TGTTGATGAAGAGGAATTTTTCAAATCATTCT             | TTCTTTTGCACCCAGAGTTGACTTAAAG                   |
| <b>E2-L/G</b>                                 | GCTATAGCAGTTGTTTCTGTTTG                      | GGTTCTCCCATTTAGAGCACAG                         |
| <b>E2-L/3</b>                                 | GCTATAGCAGTTGTTTCTGTTTG                      | GATCTCTCGTGGGATCATTG                           |
| <b>E2-3/4</b>                                 | CCAGTAATTGCAAGTTGGAGTTGGA                    | TGTGGTCCAGGTCAGAATGCA                          |
| <b>Ccnb3-1</b>                                | CCACTACTTACATGATTGCAGCC                      | AGGATGCTGCTTTCCAAAGAT                          |
| <b>Ccnb3-2</b>                                | AAAGGCATTCAATCCTGTGCG                        | GGATCTTGGCCTTCCTTTTC                           |
| <b>Ccnb3-3</b>                                | GCGTAGATATGCTTCGTGCATC                       | AGGCTGCAGCTAGCTTTGAA                           |
| <b>Ccna1</b>                                  | TGGACAGGTTTCTCTCCTGC                         | CGGGCGGATATATCTCTTCA                           |
| <b>Ccna2</b>                                  | TTACCCGGAGCAAGAAAACC                         | TTCATTAACGTTCACTGGCTTG                         |
| <b>Ccnb1</b>                                  | GGCTGACCCAAACCTCTGTA                         | TCCAGTCACTTCACGACCCT                           |
| <b>Ccnb2</b>                                  | AGCCTCTGTGAAACCAGTGC                         | TGCAGAGCAGAGCATCAGAG                           |
| <b>Ccne1</b>                                  | GTGGCTCCGACCTTTTCAGTC                        | CACAGCTTTGTCAATCTTGGCA                         |
| <b>Ccne2</b>                                  | AGGAATCAGCCCTTGCAATATC                       | CCCAGCTTAAATCTGGCAGAG                          |
| <b>Ccnd2</b>                                  | CGCAGACCTTCATCGCTC                           | CTGCTGAAGCCCACAGATG                            |
| <b>Ccnd3</b>                                  | TGCATCTATACGGACCAGGC                         | AATCAAGGCCAGGAAGTCGT                           |
| <b>B2M</b>                                    | ACACTGAATTCACCCCCACTGA                       | CGATCCCAGTAGACGGTCTTGG                         |
| <b>pGBKT7<br/>cyclin B3:</b>                  | CATGGAGGCCGAATTCATGCCACCACCACTACTA<br>CCC    | GGATCCCCGGGAATTCTCAGTGAATAATGCA<br>CAATTCAAAAG |
| <b>pRSF-DUET<br/>cyclin B3:</b>               | ACAGATTGGTGGATCCATGCCACCACCACTACTA<br>CCC    | CCGCAAGCTTGTTCGATCAGTGAATAATGCAC<br>AATTC      |
| <b>pRSF-DUET<br/>cyclin B3<br/>Δ14bp</b>      | ATTGTCTGTTCTGGATTCAAAGCATTGCTG               | GCCAAGTTCAAAGGCATTCAATCCTG                     |
| <b>pRSF-DUET<br/>zebrafish<br/>cyclin B3:</b> | ACAGATTGGTGGATCCATGCCGTTTTCAAAGGA<br>AAAAAGC | GCTCGAATTCGGATCCTCACTTCAAAGCCCTT<br>CAAGC      |

## Supplemental Table S2. Antibodies

### A. Primary Antibodies:

| Target                     | Amount for IP | Dilution for WB | Dilution for IF/IHC* | Host   | Supplier         | Catalog   |
|----------------------------|---------------|-----------------|----------------------|--------|------------------|-----------|
| Cyclin B3-mAB <sup>N</sup> | 10 µg         | 1:1000-3000     | N/A                  | Mouse  | Abmart           | C517      |
| Cyclin B3-mAB <sup>C</sup> | 2 µg          | 1:1000-3000     | N/A                  | Mouse  | Abmart           | C500      |
| Cyclin B3                  | N/A           | 1:1000          | N/A                  | Rabbit | Thermoscientific | PA5-37254 |
| SYCP3                      | N/A           | N/A             | 1:200                | Mouse  | Santa Cruz       | sc-74569  |
| γH2AX                      | N/A           | N/A             | 1:500                | Rabbit | Santa Cruz       | sc-101696 |
| DMC1                       | N/A           | N/A             | 1:100                | Rabbit | Santa Cruz       | sc-22768  |
| SYCP1                      | N/A           | N/A             | 1:100                | Rabbit | Abcam            | ab15090   |
| MLH1                       | N/A           | N/A             | 1:25                 | Rabbit | Calbiochem       | pc56      |
| pH3                        | N/A           | N/A             | 1 µg/ml              | Rabbit | Upstate          | 06-570    |

### B. Secondary Antibodies:

| Target      | Dilution for WB | Dilution for IF/IHC* | Host   | Supplier                | Catalog |
|-------------|-----------------|----------------------|--------|-------------------------|---------|
| anti-mouse  | N/A             | 1:400                | Donkey | Life Technologies       | A21203  |
| anti-rabbit | N/A             | 1:400                | Donkey | Thermofisher Scientific | R37118  |
| anti-mouse  | 1:10000         |                      | Goat   | Biorad                  | 1721011 |
| anti-rabbit | 1:10000         |                      | Goat   | Biorad                  | 1706515 |
| anti-rabbit | N/A             | 1:200                | Goat   | Vector Labs             | BA-1000 |

\* IF/IHC, immunofluorescence or immunohistochemistry.
